# Supplementary material for: 84% efficiency improvement in all-inorganic perovskite light-emitting diodes assisted by a phosphorescent material
Source: Royal Society of Chemistry journal article supplement (doi:10.1039/c7ra13231j), 2018-01-01
Supplement: c7ra13231j1.pdf [file c7ra13231j1.pdf]

## Supporting Information

### **84% efficiency improvement in all-inorganic perovskite light-emitting diodes assisted by a phosphorescent material**

Chun-Hong Gao<sup>a†\*</sup>, Xing-Juan Ma<sup>a†</sup>, Yue Zhang<sup>a</sup>, Fu-Xing Yu<sup>a</sup>, Zi-Yang Xiong<sup>a</sup>,  
Zhi-Qiang Wang<sup>a</sup>, Run Wang<sup>a</sup>, Ya-Lan Jia<sup>a</sup>, Dong-Ying Zhou<sup>b</sup>, Zu-Hong Xiong<sup>a\*</sup>

<sup>a</sup>School of Physical Science and Technology, MOE Key Laboratory on Luminescence and Real Time Analysis, Southwest University, Chongqing, 400715, China. E-mail: gch0122@swu.edu.cn

<sup>b</sup>Soochow Institute for Energy and Materials Innovations (SIEMIS), College of Physics, Optoelectronics and Energy, Soochow University, Suzhou 215006, China. E-mail: dyzhou@suda.edu.cn

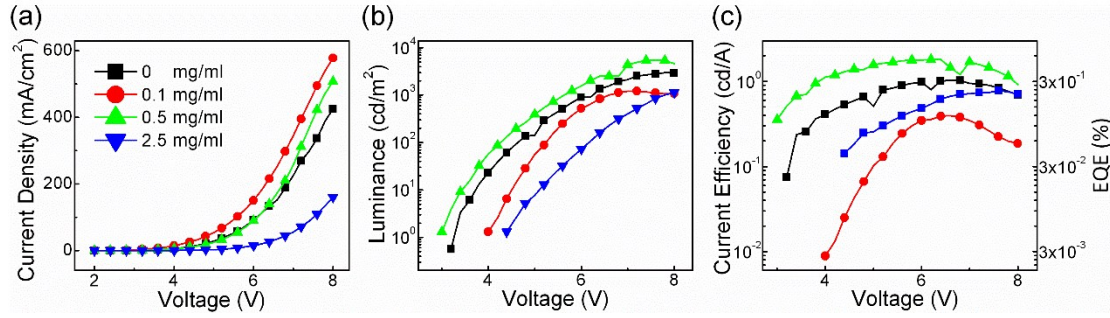

**Figure S1.** EL performances of devices with different concentrations of FIRpic: (a) current density-voltage ( $J$ - $V$ ); (b) luminance-voltage ( $L$ - $V$ ); (c) current efficiency-voltage-EQE ( $CE$ - $V$ - $EQE$ ) of four PeLEDs with structured as: ITO (120 nm)/PEDOT:PSS (30 nm)/CsPbBr<sub>3</sub>:FIRpic ( $X$  mg/ml)/TPBi (65 nm)/LiQ (2.5 nm)/ Al (120 nm), where “ $X$ ” stands for 0, 0.1, 0.5, 2.5.

**Table S1.** Summary of performances for 5 PeLEDs in a single batch with composite emitter layer CsPbBr<sub>3</sub>:FIRpic (0.5 mg/ml).

| Device No. | $V_{(\text{turn-on})}$ (V) | $L_{\text{max}}$ (cd/m <sup>2</sup> ) <sup>b</sup> | $CE_{\text{max}}$ (cd/A) <sup>c</sup> | $EQE_{\text{max}}$ (%) <sup>d</sup> |
|------------|----------------------------|----------------------------------------------------|---------------------------------------|-------------------------------------|
| 1          | 3.0                        | 5486                                               | 1.80                                  | 0.47                                |
| 2          | 2.8                        | 5214                                               | 1.64                                  | 0.43                                |
| 3          | 2.8                        | 6470                                               | 1.68                                  | 0.44                                |
| 4          | 3.3                        | 4510                                               | 1.87                                  | 0.49                                |
| 5          | 3.0                        | 3093                                               | 1.54                                  | 0.40                                |

<sup>a</sup> Turn-on voltage at 1 cd/m<sup>2</sup>.

<sup>b</sup> Maximum luminance.

<sup>c</sup> Maximum current efficiency.

<sup>d</sup> Maximum external quantum efficiency.

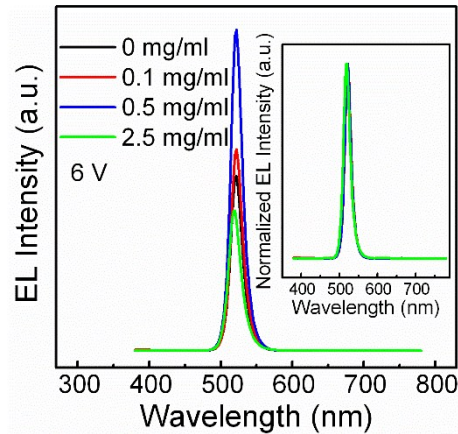

**Figure S2.** EL spectra and the Normalized EL spectra of the PeLEDs with different concentrations of FIrpc under the driving voltages of 6 V. The four PeLEDs are structured as: ITO (120 nm)/PEDOT:PSS (30 nm)/CsPbBr<sub>3</sub>:FIrpc (X mg/ml)/TPBi (65 nm)/Liq (2.5 nm)/ Al (120 nm), where “X” stands for 0, 0.1, 0.5, 2.5.

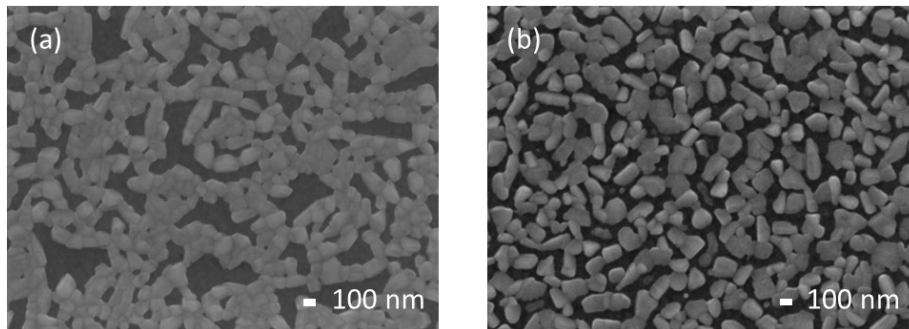

**Figure S3.** Top-view SEM images of perovskite films of (a) pristine CsPbBr<sub>3</sub>, (b) CsPbBr<sub>3</sub> with FIrpc (0.5 mg/ml). It can be found, higher coverage is achieved in the perovskite film with suitable concentration of FIrpc (0.5 mg/ml) added in the CsPbBr<sub>3</sub> (77.7%, estimated from SEM images by using ImageJ software) than the one without FIrpc (76.1%), which benefit to the EL efficiency of PeLEDs.

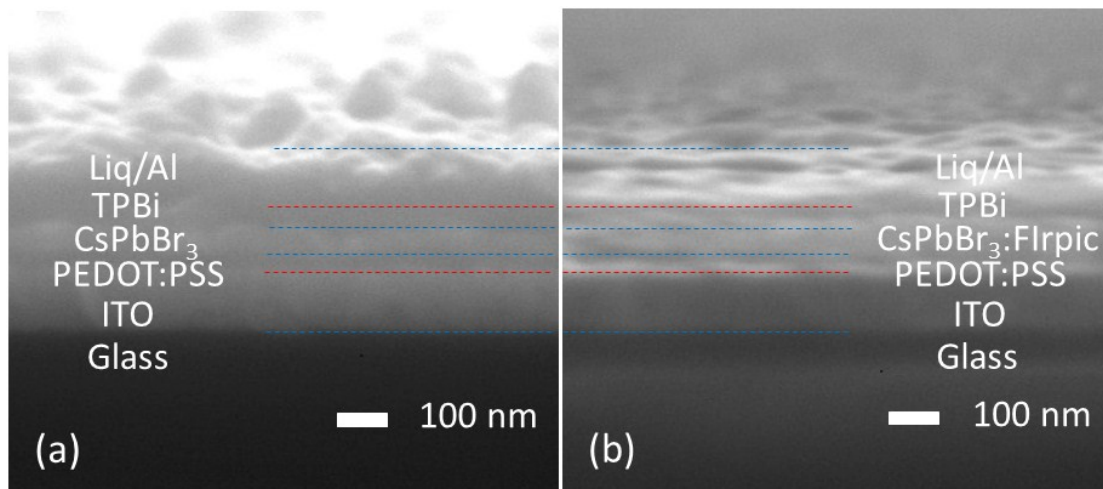

**Figure S4.** The cross-sectional SEM images of neat CsPbBr<sub>3</sub> and CsPbBr<sub>3</sub>:Flrpic (0.5 mg/ml) based PeLED. The thickness of both the neat CsPbBr<sub>3</sub> film and CsPbBr<sub>3</sub>:Flrpic film (0.5 mg/ml) are estimated to ~30 nm.
